# Supplementary material for: PAMAM G4 dendrimers as inhibitors of the iron storage properties of human L-chain ferritin
Source: Royal Society of Chemistry journal article supplement (doi:10.1039/c5cp02594j), 2015-01-01
Supplement: c5cp02594j1.pdf [file c5cp02594j1.pdf]

## Supplementary Information

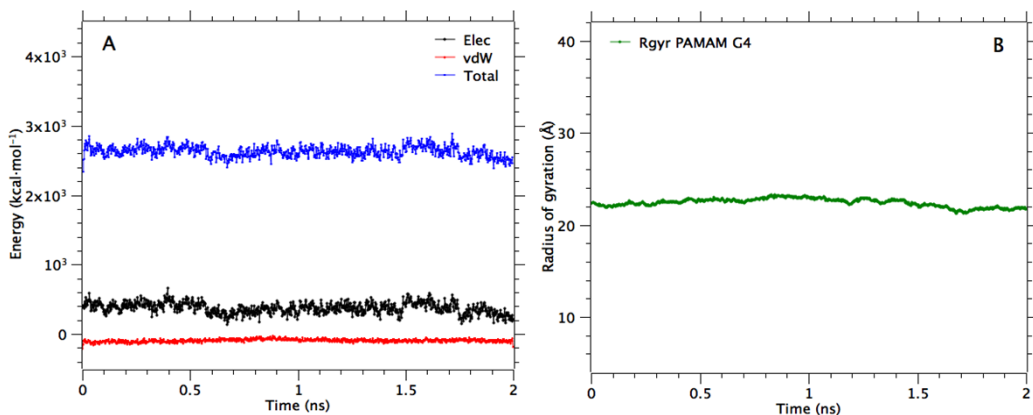

Figure 1S: a) Energetic profile of the dendrimer as a function of time, and b) radius of gyration of PAMAM G4.

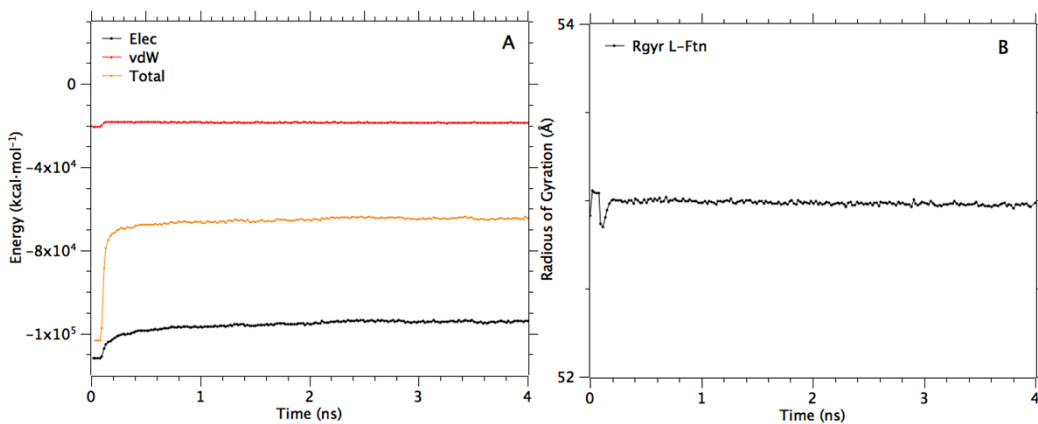

Figure 2S: a) Energetic profile of the protein as a function of time and b) radius of gyration.

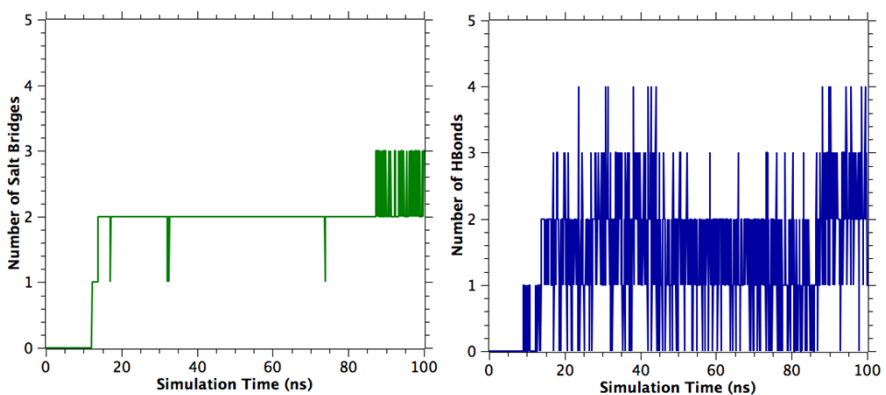

Figure 3S: Evolution of salt bridges and hydrogen bonds between the dendrimer branch and the pore of L-Ftn.
